# Supplementary material
Source: PubMed Central journal article supplement (PMC9432869)
Supplement: mmc1.pdf [file mmc1.pdf]

# THE LANCET

## Digital Health

### Supplementary appendix

This appendix formed part of the original submission and has been peer reviewed. We post it as supplied by the authors.

This online publication has been corrected. The corrected version first appeared at [thelancet.com](https://www.thelancet.com) on December 15, 2022.

Supplement to: Staessen JA, Wendt R, Yu Y-L, et al. Predictive performance and clinical application of COV50, a urinary proteomic biomarker in early COVID-19 infection: a prospective multicentre cohort study. *Lancet Digit Health* 2022; published online Aug 31. [https://doi.org/10.1016/S2589-7500\(22\)00150-9](https://doi.org/10.1016/S2589-7500(22)00150-9).

## Appendix 1

This web appendix formed part of the original submission and has been peer reviewed.

Supplement to: *Predictive performance and clinical applications of COV50, a urinary proteomic biomarker in early COVID-19 infection: a prospective multicentre cohort study*

JA Staessen, R Wendt, Y-L Yu, S Kalbitz, L Thijs, J Siwy, J Raad, J Metzger, B Neuhaus, A Papkalla, H von der Leyen, A Mebazaa, E Dudoignon, G Spasovski, M Milenkova, A Canevska-Taneska, M Salgueira Lazo, M Psychogiou, MW Rajzer, Ł Fulawka, M Dzitkowska-Zabielska, G Weiss, T Feldt, M Stegemann, J Normark, A Zoufaly, S Schmiedel, M Seilmaier, B Rumpf, M Banasik, M Krajewska, L Catanese, HD Rupprecht, B Czerwieńska, B Peters, Å Nilsson, K Rothfuss, C Lübbert, H Mischak, J Beige, the CRIT-Cov investigators

### Table of contents

|                                                                                                                                                                            |     |
|----------------------------------------------------------------------------------------------------------------------------------------------------------------------------|-----|
| <b>Urinary proteomics</b>                                                                                                                                                  | p2  |
| Sample preparation and CE-MS analysis                                                                                                                                      | p2  |
| CE-MS data processing                                                                                                                                                      | p3  |
| Sequencing of peptides                                                                                                                                                     | p3  |
| Definition of biomarkers and sample classification                                                                                                                         | p4  |
| References                                                                                                                                                                 | p4  |
| <b>The CRIT-Cov-U investigators</b>                                                                                                                                        | p6  |
| <b>Table 1</b> Sequenced peptides and parental proteins included in COV50                                                                                                  | p8  |
| <b>Table 2</b> Discriminative performance of COV50 in the interim report based on the initial recruitment                                                                  | p11 |
| <b>Table 3</b> Baseline characteristics by quartiles of the baseline COV50 distribution in the full study                                                                  | p12 |
| <b>Table 4</b> Discriminative performance of COV50 by recruitment phase                                                                                                    | p13 |
| <b>Table 5</b> Odds ratios relating outcome to COV50 by recruitment phase in hospitalised patients                                                                         | p14 |
| <b>Table 6</b> Risk and discriminatory performance associated with single risk factors by recruitment phase                                                                | p15 |
| <b>Table 7</b> Probability of progressing to a maximal WHO score during follow-up by entry COV50 level and age class                                                       | p16 |
| <b>Table 8</b> Summary of the Markov chain simulation for WHO score progression by entry COV50 level, baseline WHO score, and age class                                    | p17 |
| <b>Table 9</b> Simulated hospitalisation costs by hospital facility at presentation and age class                                                                          | p18 |
| <b>Table 10</b> Statistics extracted from outcome trials in COVID-19 patients                                                                                              | p19 |
| <b>Table 11</b> Baseline characteristics of the full CRIT Cov U cohort and the 2022 substudy                                                                               | p20 |
| <b>Figure 1</b> Transition diagram applied for Markov modelling of the probability of progression of the baseline WHO score to a higher stage during follow-up.            | p21 |
| <b>Figure 2</b> Overlap in comorbidities in the initial and continued recruitment cohorts                                                                                  | p22 |
| <b>Figure 3</b> Distribution of the urinary COV50 marker in the whole study population                                                                                     | p23 |
| <b>Figure 4</b> Distribution of the urinary biomarker COV50 at baseline by the worst WHO score attained during follow-up in the initial and continued recruitment cohorts. | P24 |
| <b>Figure 5</b> Performance of the COV50 urinary marker on top of other baseline risk factors in 816 hospitalised patients                                                 | p25 |

## Urinary proteomics

### ***Sample preparation and CE-MS analysis***

Sample preparation and capillary electrophoresis coupled with mass spectrometry (CE-MS) analysis were performed essentially as described.<sup>1</sup> Urine aliquots were thawed and 700  $\mu$ l mixed with 700  $\mu$ l of 2 M urea, 10 mM  $\text{NH}_4\text{OH}$  containing 0.02 % SDS. Subsequently, samples were ultrafiltered using a Centrstat 20 kDa cut-off centrifugal filter device (Satorius, Göttingen, Germany) to eliminate high molecular weight proteins. The obtained filtrate was desalted using a PD 10 gel filtration column (GE Healthcare Bio Sciences, Uppsala, Sweden) to remove urea, electrolytes and salts as well as to enrich polypeptides. The samples were lyophilized and stored at 4°C until usage. Shortly before CE-MS analysis, the samples were re-suspended in 10  $\mu$ l HPLC-grade  $\text{H}_2\text{O}$ . Samples were injected into CE-MS with 2 psi for 99 sec, resulting in injection volumes of ~280 nl.

A P/ACE MDQ capillary electrophoresis system (Beckman Coulter, Fullerton, CA) was coupled with a MicrOTOF II MS (Bruker Daltonic, Bremen, Germany). A solution of 20% acetonitrile (Sigma-Aldrich, Taufkirchen, Germany) in HPLC-grade water (Roth, Karlsruhe, Germany) supplemented with 0.94% formic acid (Sigma-Aldrich) was used as running buffer. For CE-MS analysis, the electrospray ionization interface from Agilent Technologies (Palo Alto, CA) was set to a potential of -4.0 to -4.5 kV. Spectra were recorded over an  $m/z$  range of 350-3000 and accumulated every 3 sec.

### ***CE-MS data processing***

After the CE-MS analysis, mass spectral ion peaks representing identical molecules at different charge states were deconvoluted into single masses using MosaFinder software.<sup>2</sup> Only signals with  $z > 1$  observed in a minimum of 3 consecutive spectra with a signal-to-noise ratio of at least 4 were considered. The resulting peak list characterises each polypeptide by

its mass and migration time. Data were calibrated utilising 3151 internal standards as reference data points for mass and migration time by applying global and local linear regression, respectively. Reference signals of 29 abundant peptides were used as internal standards for calibration of signal intensity using linear regression. This procedure is highly reproducible and addresses both analytical and dilution variances in a single calibration step.<sup>3</sup> Among 60 independent analytic runs of a single urine sample, the coefficient of variation was 1%.<sup>4</sup> The obtained peak list characterises each polypeptide by its calibrated molecular mass [Da], calibrated CE migration time [min] and normalised signal intensity. All detected peptides were deposited, matched, and annotated in a Microsoft SQL database allowing further statistical analysis.

### ***Sequencing of peptides***

Candidate biomarkers were sequenced using CE-MS/MS or LC-MS/MS analysis, as described in detail.<sup>5</sup> MS/MS experiments were using an Ultimate 3000 nano-flow system (Dionex/LC Packings, USA) or a P/ACE MDQ capillary electrophoresis system (Beckman Coulter, Fullerton, CA), both connected a Q Exactive™ Plus Hybrid Quadrupole-Orbitrap™ Mass Spectrometer (ThermoFisher Scientific, Waltham, Massachusetts, USA). The mass spectrometer is operated in data-dependent mode to automatically switch between MS and MS/MS acquisition. Survey full-scan MS spectra (from  $m/z$  300–2000) were acquired in the Orbitrap. Ions were sequentially isolated for fragmentation. Data files were searched against the UniProt human nonredundant database using Proteome Discoverer 2.4 and the SEQUEST search engine. Relevant settings were: no fixed modifications, oxidation of methionine and proline as variable modifications. The minimum precursor mass was set to 790 Da, maximum precursor mass to 6000 Da with a minimum peak count of 10. The high-confidence peptides were defined by cross-correlation (Xcorr) >1.9 and rank = 1. Precursor

mass tolerance was 5 ppm and fragment mass tolerance 0.05 Da. For further validation of obtained peptide derivations, the correlation between peptide charge at the working pH of 2 and CE-migration time was utilised to minimise false-positive derivation rates:<sup>6</sup> calculated CE-migration time of the sequence candidate based on its peptide sequence (number of basic amino acids) was compared to the experimental migration time.

### **Sample classification**

A disease-specific peptide-based classifier was developed using support vector machine (SVM)-based MosaCluster software, as described before.<sup>7</sup> The COV50 marker was expressed as a numerical value quantifying the Euclidean distance of the data point to the maximal margin of the separation hyperplane among cases and controls in a multidimensional space.

### **References**

- 1 Mischak H, Vlahou A, Ioannidis JPA. Technical aspects and inter-laboratory variability in native peptide profiling: the CE-MS experience. *Clin Biochem* 2013; **46**: 432-43.
- 2 Latosinska A, Siwy J, Mischak H, Frantzi M. Peptidomics and proteomics based on CE-MS as a robust tool in clinical application: the past, the present, and the future. *Electrophoresis* 2019; **40**: 2294-308.
- 3 Jantos-Siwy J, Schiffer E, Brand K, et al. Quantitative urinary proteome analysis for biomarker evaluation in chronic kidney disease. *J Proteome Res* 2009; **8**: 268-81.
- 4 Mavrogeorgis E, Mischak H, Latosinska A, Siwy J, Jankowski V, Jankowski J. Reproducibility evaluation of urinary peptide detection using CE-MS. *Molecules* 2021; **26**: 7260.

- 5 Klein J, Papadopoulos T, Mischak H, Mullen W. Comparison of CE-MS/MS and LC-MS/MS sequencing demonstrates significant complementarity in natural peptide identification in human urine. *Electrophoresis* 2014; **35**: 1060-64.
- 6 Zürlbig P, Renfrow MB, Schiffer E, et al. Biomarker discovery by CE-MS enables sequence analysis via MS/MS with platform-independent separation. *Electrophoresis* 2006; **27**: 2111-25.
- 7 Wendt R, Thijs L, Kalbitz S, et al. A specific urinary peptidomic profile predicts outcome in SARS-CoV-2-infected patients. *eClinicalMedicine* 2021; **35**: 100883.

### **CRIT-Cov-U investigators**

*Department of Infectious Diseases/Tropical Medicine, Nephrology/KfH Renal Unit and Rheumatology, St. Georg Hospital Leipzig, Germany — J Beige, J Ermisch, S Kalbitz, N Kellner, C Lübbert, L Peruth-Stutzmann, S Schroth, J Schmidt, U Schmidt, R Wendt.*

*Research Unit Hypertension and Cardiovascular Epidemiology, KU Leuven Department of Cardiovascular Diseases, University of Leuven, Leuven, Belgium — L Thijs.*

*Research Unit Environment and Health, Department of Public Health, University of Leuven, Leuven, Belgium —Y-L Yu.*

*Mosaiques-Diagnostics GmbH, Hannover, Germany — J Metzger, H Mischak, J Raad, J Siwy.*

*Center for Clinical Trials - CTS, Medizinische Hochschule, Hannover, Germany — D Breuer, B Neuhaus, A Papkalla, H von der Leyen.*

*Department of Anaesthesiology and Intensive Care, Hôpital Saint Louis-Lariboisière, Paris, France — F Abeud, E Dudoignon, M-C Fournier, B Louadah, A Mebazaa.*

*Hospital Virgen Macarena, Sevilla, Spain — F Alonso García, L Fraile Rojas, R Molas, M Salgueira Lazo.*

*Nodo Biobanco Hospital Universitario Virgen Macarena. Biobanco del Sistema Sanitario Público de Andalucía — I Cezara Hrom, I García Sánchez,*

The Biobank Nodo Hospital Virgen Macarena (Biobanco del Sistema Sanitario Público de Andalucía) is integrated in the Spanish National biobanks Network (PT20/00069) supported by ISCIII and FEDER funds.

*Cyril and Methodius University, Skopje, Republic of North Macedonia — A Canevska-Taneska, M Milenkova, G Spasovski.*

*Uniwersytet Śląski w Katowicach, Katowice, Silesia, Poland — B Czerwieńska, A Więcek.*

*Department of Nephrology, Skaraborg Hospital, Skövde, and Department of Molecular and Clinical Medicine, Institute of Medicine, The Sahlgrenska Academy at University of Gothenburg, Sweden — B Peters*

*Research and Development Centre, Skaraborg Hospital, Skövde, Sweden — B Peters, Å Nilsson*

*Department of Gastroenterology, Hepatology and Endocrinology, Robert Bosch Hospital, Stuttgart, Germany — K Rothfuss.*

*Dr. Margarete Fischer-Bosch-Institute of Clinical Pharmacology, Stuttgart, Germany - M Schwab.*

*Division of Infectious Diseases and Tropical Medicine, Leipzig University Medical Center, Leipzig, Germany — C Lübbert.*

*Research Institute Alliance for the Promotion of Preventive Medicine, Mechelen Belgium — K Asayama, TW Hansen, GE Maestre, JA Staessen.*

*Biomedical Sciences Group, Faculty of Medicine, University of Leuven, Leuven, Belgium — JA Staessen.*

*Martin Luther University, Halle-Wittenberg, Halle an der Saale, Germany — J Beige.*

*First Department of Internal Medicine, Laiko General Hospital, Medical School, National and Kapodistrian University of Athens, Athens, Greece — M Psychogiou, D Basoulis, G Karamanakos.*

*First Department of Cardiology Interventional Electrophysiology and Arterial Hypertension, Jagiellonian University Medical College, Kraków, Poland —P Lis, A Olszanecka, MW Rajzer.*

*Department of Internal Medicine II, Medical University of Innsbruck—R Bellmann-Weiler, L Lanser, G Weiss.*

*Department of Clinical Microbiology, Umeå University, Umeå, Sweden— A Edin, NE Forsell, J Normark, B Stegmayr.*

*Department of Gastroenterology, Hepatology and Infectious Diseases, Medical Faculty of the Heinrich Heine University, Düsseldorf, Germany—T Feldt, BEO Jensen, HM Orth.*

*Department of Infectious Diseases and Respiratory Medicine, Charité-Universitätsmedizin Berlin, Germany—S Borstel, A Mikolajewska, M Stegemann.*

*Department of Medicine IV, Clinic Favoriten and Faculty of Medicine, Sigmund Freud University, Vienna, Austria—A Zoufaly.*

*Internal Medicine III, Nephrology & Dialysis, Medical University of Vienna, Austria— M Hecking, B Rumpf, L Schmözl.*

*Center of Translational Medicine and Department of Hypertension & Diabetology, Medical University of Gdańsk, Poland - M Dzitkowska-Zabielska, M Hoffmann, K Narkiewicz.*

*Department of Nephrology and Transplantation Medicine, Department of Clinical Nursing, Division of Nursing in Internal Medicine Procedures, Screening Laboratory of Biological Activity Tests and Collection of Biological Material, Wrocław Medical University, Poland —M Banasik, M Krajewska, A Matera-Witkiewicz, J Zachciał.*

*Molecular Pathology Centre Cellgen, Wrocław, Poland—Ł Fulawka, M Litwin, P Marciniak.*

*Medical Department I and Bernhard-Nocht-Clinic for Tropical Medicine, University Medical Center Hamburg Eppendorf, Hamburg, Germany—S Schmiedel.*

*Department of Haematology, Oncology, Immunology, Palliative Care, Infectious Disease and Tropical Medicine, München Klinik Schwabing, München, Germany—M Seilmaier.*

*Department of Nephrology, Angiology and Rheumatology, Hospital Bayreuth, Bayreuth, Germany—L Catanese, HD Rupprecht.*



**Table 1: Sequenced peptides and parental proteins included in COV50**

| Mean amplitude WHO stages 1-3 | Mean amplitude WHO stages 6-8 | Fold difference | Amino-acid sequence                              | Parental protein                                   | AUC    | p value    |
|-------------------------------|-------------------------------|-----------------|--------------------------------------------------|----------------------------------------------------|--------|------------|
| 1432.28                       | 19.89                         | 72.0101         | GGSKRISIGGGS                                     | Keratin, type II cytoskeletal 6B                   | 0.6039 | 7.7990E-07 |
| 10138.45                      | 539.76                        | 18.7833         | LmIEQNTKSPLFMGKVVNPTQK                           | Alpha-1-antitrypsin                                | 0.7638 | 3.0497E-29 |
| 28478.81                      | 2036.69                       | 13.9829         | EDPQQDAAQKTDTSHHQDQDHTFNKIPNLAE                  | Alpha-1-antitrypsin                                | 0.7624 | 1.8618E-24 |
| 123.57                        | 10.81                         | 11.4311         | AGPpGKAGEDGHPGKpGRpGERG                          | Collagen alpha-2(I) chain                          | 0.6714 | 2.3505E-21 |
| 1345.11                       | 142.33                        | 9.4506          | AGPpGKAGEDGHpGKpGRpGERG                          | Collagen alpha-2(I) chain                          | 0.7420 | 5.9622E-21 |
| 1436.74                       | 179.06                        | 8.0238          | TGAKGAAGLpGVAGApGLpGPRGlpGPVGAAGATGARG           | Collagen alpha-2(I) chain                          | 0.7782 | 3.4876E-31 |
| 234.71                        | 31.09                         | 7.5494          | GPpGPKGNSGepGApGSKGDTGAKGepGPVG                  | Collagen alpha-1(I) chain                          | 0.6839 | 1.6287E-13 |
| 2394.78                       | 406.86                        | 5.8860          | KGEKGDGSGASGREGFPpGpGGTGP                        | Collagen alpha-1(VII) chain                        | 0.7240 | 9.3676E-28 |
| 2191.92                       | 399.81                        | 5.4824          | LQGLPGTGGppGENGKpGepGpKGDAGApGApGGKGDAGApGERGpPG | Collagen alpha-1(III) chain                        | 0.7807 | 5.4736E-27 |
| 4321.59                       | 795.43                        | 5.4330          | SETAPAAPAAPAPAEKTPVKKKA                          | Histone H1,4                                       | 0.7764 | 4.3675E-23 |
| 5120.09                       | 1034.77                       | 4.9480          | GPEGPSGKpGINGKDGIPGAQImGKpGDRGpKGERGDQGIP        | Collagen alpha-1(XIX) chain                        | 0.7848 | 4.7943E-29 |
| 4391.47                       | 1077.18                       | 4.0768          | PpGESGREGApGAEGSpGRDGSPPGAKGDRGETGP              | Collagen alpha-1(I) chain                          | 0.8086 | <1E-25     |
| 2086.96                       | 615.11                        | 3.3928          | LkGQpGApGVkGepGApGENGTpGQTGARG                   | Collagen alpha-2(I) chain                          | 0.7775 | 9.4967E-24 |
| 10861.9                       | 8257.89                       | 1.3153          | FDVNDEKNWGLS                                     | Alpha-1-acid glycoprotein 1                        | 0.5220 | 4.6569E-01 |
| 254.23                        | 256.58                        | 0.9908          | GLSMDGGGSPKGDVDP                                 | Sodium/potassium-transporting ATPase subunit gamma | 0.6484 | 8.2980E-08 |
| 268.76                        | 325.15                        | 0.8266          | EEKAVADTRDQADGRASVDSGSSEEQGGSSRALVST             | Polymeric immunoglobulin receptor                  | 0.6941 | 1.2074E-12 |
| 1289.63                       | 1826.87                       | 0.7059          | NSGepGApGSKGDTGAKGepGPVG                         | Collagen alpha-1(I) chain                          | 0.6613 | 1.0102E-08 |
| 1573.18                       | 2270.16                       | 0.6930          | WVGTGASEAEKTGAQEL                                | Gelsolin                                           | 0.6590 | 1.4941E-08 |
| 819.38                        | 1217.08                       | 0.6732          | EAGGGSNSLQNSP                                    | FERM domain-containing protein 4A                  | 0.6709 | 1.1552E-09 |
| 6502.2                        | 9818.1                        | 0.6623          | EGSpGRDGSppGAKGDRGETGPA                          | Collagen alpha-1(I) chain                          | 0.6492 | 1.1940E-07 |
| 4040.6                        | 6368.69                       | 0.6344          | pGKDGDGTGPTGPQGPQ                                | Collagen alpha-1(XXII) chain                       | 0.6562 | 2.9324E-08 |
| 349.17                        | 559.11                        | 0.6245          | GpKGDpGlpGLDRSGFpGETGSPGIPGHQ                    | Collagen alpha-3(IV) chain                         | 0.6546 | 3.1735E-08 |
| 2612.3                        | 4260.77                       | 0.6131          | ESGREGApGAEGSpGRDGSppGAKGDRGETGP                 | Collagen alpha-1(I) chain                          | 0.7183 | 7.3786E-15 |

| Mean amplitude WHO stages 1-3 | Mean amplitude WHO stages 6-8 | Fold difference | Amino-acid sequence                                | Parental protein                   | AUC    | p value    |
|-------------------------------|-------------------------------|-----------------|----------------------------------------------------|------------------------------------|--------|------------|
| 3551.59                       | 6057.37                       | 0.5863          | PGTpGSPGPAGASGNPG                                  | Collagen alpha-1(II) chain         | 0.7032 | 4.4980E-13 |
| 1029.17                       | 1956.35                       | 0.5261          | GRPEAQPPPLSSEHKEPVAGDAVPKPKDGSAPVVRGA              | Neurosecretory protein VGF         | 0.7143 | 1.9560E-14 |
| 337.17                        | 645.44                        | 0.5224          | DQGPVGRTEVGVAVGPpGFAGEKGPpSGEAGTAGPPGTpGPQG        | Collagen alpha-2(I) chain          | 0.7188 | 3.0958E-15 |
| 8454.59                       | 16930.27                      | 0.4994          | VGPpGPpGPpGPpGPPS                                  | Collagen alpha-1(I) chain          | 0.6906 | 1.1385E-11 |
| 1222.72                       | 2550.98                       | 0.4793          | PpGPAGFAGPPGADGQPGAKGEPGDAGAKGDAGPPGPA GP          | Collagen alpha-1(I) chain          | 0.7498 | <1E-25     |
| 381.09                        | 824.39                        | 0.4623          | GpAGPRGERGPpGESGA                                  | Collagen alpha-2(I) chain          | 0.7229 | 1.6009E-15 |
| 2046.46                       | 4449.59                       | 0.4599          | VGPpGPPGPpGPpGPPS                                  | Collagen alpha-1(I) chain          | 0.7167 | 1.1599E-14 |
| 1957.84                       | 4464.36                       | 0.4385          | PQGPpGPTGpGGDKGDTGpGPQGLQLpGT                      | Collagen alpha-1(III) chain        | 0.7188 | 5.9850E-15 |
| 1850.08                       | 4432.16                       | 0.4174          | GPpGVPGpGPpGGSPGLP                                 | Collagen alpha-1(XXII) chain       | 0.7518 | <1E-25     |
| 570.53                        | 1393.57                       | 0.4094          | GpAGPPGPPGPPGTSGHPGSPGSPGYQGPPGEPGQAGP SGPPG       | Collagen alpha-1(III) chain        | 0.7443 | <1E-25     |
| 244.19                        | 601.77                        | 0.4058          | FPGQTGPRGEMGQp                                     | Collagen alpha-1(VII) chain        | 0.7309 | <1E-25     |
| 372.75                        | 1136.9                        | 0.3279          | GSEGPQGVREPGpPGPAGAAGPAGNPGADGQPGAKG ANG           | Collagen alpha-1(I) chain          | 0.7684 | <1E-25     |
| 249.66                        | 771.02                        | 0.3238          | ERGEAGIpGVpGAKGEDGKDGSPGEPGANG                     | Collagen alpha-1(III) chain        | 0.7779 | <1E-25     |
| 1797.67                       | 6089.45                       | 0.2952          | PpGESGREGApGAEGSpGRDGSpGAKGDRGETGP                 | Collagen alpha-1(I) chain          | 0.8310 | <1E-25     |
| 51.62                         | 179.98                        | 0.2868          | NDGApGKNGERGGpGGp                                  | Collagen alpha-1(III) chain        | 0.7561 | <1E-25     |
| 306.22                        | 1176.88                       | 0.2602          | SGQSSGYTqhGSGSGh                                   | Hornerin                           | 0.7144 | 3.0958E-15 |
| 144.09                        | 559.6                         | 0.2575          | ppGSNGNpGPPGPPGSPGKDGPKGARGDSGPPGRAGEP G           | Collagen alpha-1(II) chain         | 0.7509 | <1E-25     |
| 172.43                        | 709.58                        | 0.2430          | EDGHpGKpGRpGERG                                    | Collagen alpha-2(I) chain          | 0.8101 | <1E-25     |
| 105.18                        | 478.47                        | 0.2198          | DDGEAGKpGRpG                                       | Collagen alpha-1(I) chain          | 0.7914 | <1E-25     |
| 14.6                          | 74.52                         | 0.1959          | PGPVGpPGSNGPVGEPGPEGPAGNDGTPGRDGAVERG DRGDpGPAGLPG | Collagen alpha-2(V) chain          | 0.6604 | 4.1952E-12 |
| 85.74                         | 441.2                         | 0.1943          | GTDGpMGpHGPAGPKGERGE                               | Collagen alpha-1(XXV) chain        | 0.7865 | <1E-25     |
| 197.45                        | 1129.00                       | 0.1749          | EEDDGEVTEDESDDFIQP                                 | E3 ubiquitin-protein ligase TRIM33 | 0.8410 | <1E-25     |
| 280.74                        | 1745.34                       | 0.1609          | DADLADGVSGGEGKGGSDGGGSHRKEGEEADAPGVIPGI VGAVV      | CD99 antigen                       | 0.8359 | <1E-25     |

| Mean amplitude WHO stages 1-3 | Mean amplitude WHO stages 6-8 | Fold difference | Amino-acid sequence                            | Parental protein                  | AUC    | p value |
|-------------------------------|-------------------------------|-----------------|------------------------------------------------|-----------------------------------|--------|---------|
| 87.85                         | 559.87                        | 0.1569          | IDGSpGEKGDVGGPGPPGASGEPGAPGPPGKRGPS            | Collagen alpha-3(V) chain         | 0.7534 | <1E-25  |
| 11.18                         | 119.19                        | 0.0938          | DDPRPPNPPKMPNPNHPSSSGS                         | CD99 antigen                      | 0.7133 | <1E-25  |
| 348.81                        | 4044.53                       | 0.0862          | EEKAVADTRDQADGSRASVDSGSSEEQGGSSRALVSTLV<br>PLG | Polymeric immunoglobulin receptor | 0.8427 | <1E-25  |
| 5.03                          | 127.72                        | 0.0394          | HVSGSGQSSGFGQHESRSGHSSYGQHGFSSQSSGYG           | Filaggrin-2                       | 0.7537 | <1E-25  |

The peptide amino acid sequence and the parental protein of origin are listed. For each peptide, the mean relative abundance in the urine from patients with moderate disease (maximal who grade 1-3) and the urine from patients with critical disease (maximal who grade 6-8) is given, the fold change between these two groups, the AUC, and the p-value (after correction for multiple testing).

**Table 2: Discriminative performance of COV50 in the interim report based on the initial recruitment**

| Outcome                                       | Derivation cohort | Validation cohort |
|-----------------------------------------------|-------------------|-------------------|
| <b>Mortality</b>                              |                   |                   |
| Number events/at risk                         | 23/228            | 10/99             |
| <i>Continuously distributed COV50</i>         |                   |                   |
| AUC (95% confidence interval)                 | 0.82 (0.74–0.89)  | 0.83 (0.71–0.94)  |
| Cross-validated AUC (95% confidence interval) | 0.80 (0.72–0.88)  | NA                |
| <i>Categorised COV50</i>                      |                   |                   |
| Youden cut-off threshold                      | 0.47              | 0.47              |
| Sensitivity                                   | 87.0 (73.1–100)   | 80.0 (55.0–1.00)  |
| Specificity                                   | 74.6 (68.7–80.6)  | 70.8 (61.3–80.2)  |
| <b>Progressing WHO score</b>                  |                   |                   |
| Number events/at risk                         | 48/228            | 23/99             |
| <i>Continuously distributed COV50</i>         |                   |                   |
| AUC (95% confidence interval)                 | 0.75 (0.67–0.82)  | 0.70 (0.58–0.81)  |
| Cross-validated AUC (95% confidence interval) | 0.74 (0.66–0.81)  | NA                |
| <i>Categorised COV50</i>                      |                   |                   |
| Youden cut-off threshold                      | 0.04              | 0.04              |
| Sensitivity (95% confidence interval)         | 77.1 (65.2–89.0)  | 73.9 (56.0–91.9)  |
| Specificity (95% confidence interval)         | 63.9 (56.9–70.9)  | 63.2 (52.3–74.0)  |

AUC indicates area under the curve. The AUC in the validation cohort was derived from the probabilities as predicted by the logistic model in the derivation cohort. Sensitivity and specificity in the validation cohort were based on the thresholds obtained in the derivation cohort. NA indicates not applicable. The validation cohort (n=99) are included in the continued recruitment. Reproduced from Wendt et al., *EClinicalMedicine* 2021; 36: 100883 (doi: 10.1016/j.eclinm.2021.100883).

**Table 3: Baseline characteristics by quartiles of the baseline COV50 distribution in the full study**

| Characteristic                        | Low          | Medium-low     | Medium-high   | High         | p value for trend |
|---------------------------------------|--------------|----------------|---------------|--------------|-------------------|
| COV50 limits                          | -1.28        | [-1.27, -0.30] | [-0.28, 0.79] | ≥0.80        |                   |
| Number in group                       | 253          | 253            | 253           | 253          | ...               |
| Main study variables                  |              |                |               |              |                   |
| Maximal WHO score during follow-up    |              |                |               |              |                   |
| 1-3                                   | 216 (85.4)   | 118 (46.6)     | 78 (30.8)     | 33 (13.0)    |                   |
| 4-5                                   | 37 (14.6)    | 132 (52.2)     | 173 (68.4)    | 187 (73.9)   | <0.0001           |
| 6-8                                   | 0 (0.0)      | 3 (1.2)        | 2 (0.8)       | 33 (13.0)    |                   |
| Mean COV50 biomarker level at entry   | -2.01 (0.45) | -0.76 (0.28)   | 0.22 (0.31)   | 1.63 (0.56)  | ...               |
| Number with characteristic (%)        |              |                |               |              |                   |
| White ethnicity                       | 210 (83.0)   | 221 (87.4)     | 226 (89.3)    | 223 (92.1)   | <0.0001           |
| Women                                 | 136 (53.7)   | 122 (48.2)     | 109 (43.1)    | 80 (31.6)    | <0.0001           |
| Hypertension                          | 78 (30.8)    | 131 (51.8)     | 157 (62.1)    | 191 (75.5)   | <0.0001           |
| Heart failure                         | 12 (4.7)     | 28 (11.1)      | 64 (25.3)     | 50 (19.8)    | <0.0001           |
| Body mass index ≥30 kg/m <sup>2</sup> | 56 (22.1)    | 72 (28.5)      | 68 (26.9)     | 55 (21.7)    | 0.2021            |
| Diabetes mellitus                     | 21 (8.3)     | 43 (17.0)      | 81 (32.0)     | 112 (44.3)   | <0.0001           |
| Cancer                                | 10 (4.0)     | 26 (10.3)      | 24 (9.5)      | 46 (18.2)    | <0.0001           |
| Use of RAS blockers,                  | 59 (23.3)    | 102 (40.3)     | 129 (51.0)    | 137 (54.2)   | <0.0001           |
| Mean (SD) of characteristic           |              |                |               |              |                   |
| Age                                   | 49.0 (16.9)  | 59.9 (16.6)    | 67.9 (15.6)   | 72.3 (12.2)  | <0.0001           |
| Systolic blood pressure, mm Hg        | 126.1 (18.8) | 128.4 (19.1)   | 129.3 (20.1)  | 128.8 (22.0) | 0.1248            |
| Diastolic blood pressure, mm Hg       | 78.2 (11.3)  | 77.8 (12.0)    | 75.4 (11.9)   | 73.3 (12.7)  | <0.0001           |
| Heart rate, beats per minute          | 79.2 (13.6)  | 82.3 (15.5)    | 82.5 (15.8)   | 84.8 (16.6)  | 0.0002            |
| Body mass index, kg/m <sup>2</sup>    | 26.8 (5.2)   | 28.2 (5.4)     | 28.2 (5.2)    | 27.3 (5.1)   | 0.2510            |

RAS blockers indicate blocker of the renin-angiotensin system, including angiotensin-converting enzyme inhibitors and angiotensin-receptor blockers. The number of participants with missing blood pressure and heart rate amounted to 11, 7, 8 and 5 in the low, medium-low, medium-high and high groups. An ellipsis indicates not applicable. The p-value for trend was derived by regressing the row entries on a dummy variable ranging from 1 to 4, coding for the increasing categories of COV50. An ellipsis indicates that the p-value was not calculated.

**Table 4: Discriminative performance of COV50 by recruitment phase**

| <b>Outcome</b>                        | <b>Initial</b>   | <b>Continued</b> | <b>Full</b>      |
|---------------------------------------|------------------|------------------|------------------|
| <b>Mortality</b>                      |                  |                  |                  |
| N° deaths/at risk (%)                 | 25/228 (11.0)    | 94/784 (12.0)    | 119/1012 (11.8)  |
| Continuously distributed COV50        |                  |                  |                  |
| AUC (95% confidence interval)         | 0.83 (0.77-0.90) | 0.83 (0.77-0.90) | 0.81 (0.77-0.85) |
| Categorised COV50                     |                  |                  |                  |
| Youden cut-off threshold              | 0.47             | 0.47             | 0.47             |
| Sensitivity (95% confidence interval) | 88.0 (68.8-97.4) | 71.3 (61.0-80.1) | 74.8 (66.0-82.3) |
| Specificity (95% confidence interval) | 75.4 (68.8-81.1) | 74.1 (70.6-77.3) | 74.4 (71.4-77.2) |
| PLR (95% confidence interval)         | 3.57 (2.70-4.73) | 2.75 (2.30-3.29) | 2.92 (2.50-3.40) |
| NLR (95% confidence interval)         | 0.16 (0.05-0.46) | 0.39 (0.28-0.53) | 0.34 (0.25-0.46) |
| Accuracy                              | 76.8 (70.7-82.1) | 73.2 (70.5-76.8) | 74.4 (71.6-77.1) |
| <b>Progressing WHO score</b>          |                  |                  |                  |
| N° events/at risk (%)                 | 50/228 (21.9)    | 221/784 (28.3)   | 271/1012 (26.8)  |
| Continuously distributed COV50        |                  |                  |                  |
| AUC (95% confidence interval)         | 0.76 (0.69-0.83) | 0.76 (0.69-0.83) | 0.72 (0.68-0.75) |
| Categorised COV50                     |                  |                  |                  |
| Youden cut-off threshold              | 0.04             | 0.04             | 0.04             |
| Sensitivity (95% confidence interval) | 80.0 (66.3-90.0) | 64.7 (58.0-71.0) | 67.5 (61.6-73.1) |
| Specificity (95% confidence interval) | 64.6 (57.1-71.6) | 68.2 (64.2-72.0) | 67.3 (63.8-70.7) |
| PLR (95% confidence interval)         | 2.26 (1.77-2.88) | 2.04 (1.74-2.38) | 2.07 (1.81-2.36) |
| NLR (95% confidence interval)         | 0.31 (0.18-0.54) | 0.52 (0.43-0.62) | 0.48 (0.40-0.58) |
| Accuracy                              | 68.0 (61.5-74.0) | 67.2 (63.8-70.5) | 67.4 (64.4-70.3) |

Initial recruitment lasted from 30 June 2020 until 19 November 2020 and continued recruitment from 30 April 2020 until 14 April 2021. NA indicates not applicable. AUC=area under the curve. PLR is the positive likelihood ratio (true positive rate/false positive rate). NLR is the negative likelihood ratio (false negative rate/true negative rate). Accuracy is the overall probability that a patient is correctly classified. All estimates in this table were unadjusted for other risk factors.

**Table 5: Risk and discriminatory performance associated with single risk factors by recruitment phase**

| Outcome                             | Initial       |                  | Continued      |                  | Full            |                  |         |
|-------------------------------------|---------------|------------------|----------------|------------------|-----------------|------------------|---------|
|                                     | Estimate      | p                | Estimate       | p                | Estimate        | p                |         |
| <b>Mortality</b>                    |               |                  |                |                  |                 |                  |         |
| N° deaths/at risk (%)               | 25/228 (11.0) |                  | 94/784 (12.0)  |                  | 119/1012 (11.8) |                  |         |
| Female sex                          | OR            | 0.32 (0.12-0.89) | 0.0284         | 0.32 (0.12-0.89) | 0.0284          | 0.53 (0.35-0.80) | 0.0025  |
| Age, +10 years                      | OR            | 1.32 (1.01-1.74) | 0.0442         | 2.39 (1.94-2.95) | <0.0001         | 2.01 (1.71-2.37) | <0.0001 |
|                                     | AUC           | 0.62 (0.52-0.72) | 0.0442         | 0.80 (0.77-0.84) | <0.0001         | 0.77 (0.73-0.80) | <0.0001 |
| BMI, +5 kg/m <sup>2</sup>           | OR            | 1.04 (0.72-1.52) | 0.8346         | 1.01 (0.83-1.24) | 0.9063          | 1.02 (0.85-1.22) | 0.8514  |
| Comorbidities present               | OR            | 1.81 (0.79-4.17) | 0.1633         | 3.92 (2.42-6.35) | <0.0001         | 3.27 (2.17-4.92) | <0.0001 |
| GFR, +30 ml/min/1.73 m <sup>2</sup> | OR            | 0.62 (0.41-0.95) | 0.0286         | 0.57 (0.45-0.73) | <0.0001         | 0.58 (0.47-0.72) | <0.0001 |
|                                     | AUC           | 0.61 (0.48-0.75) | 0.0286         | 0.65 (0.59-0.72) | <0.0001         | 0.64 (0.58-0.73) | <0.0001 |
| WHO score, +1 point                 | OR            | 2.07 (1.42-3.01) | 0.0002         | 3.23 (2.35-4.44) | <0.0001         | 2.40 (1.94-2.95) | <0.0001 |
|                                     | AUC           | 0.75 (0.67-0.83) | 0.0002         | 0.75 (0.71-0.79) | <0.0001         | 0.74 (0.71-0.78) | <0.0001 |
| COV50 (+1 SD)                       | OR            | 2.44 (1.69-3.54) | <0.0001        | 2.47 (2.02-3.03) | <0.0001         | 2.44 (2.05-2.92) | <0.0001 |
|                                     | AUC           | 0.83 (0.77-0.90) | <0.0001        | 0.80 (0.76-0.85) | <0.0001         | 0.81 (0.77-0.85) | <0.0001 |
| <b>Worsening WHO score</b>          |               |                  |                |                  |                 |                  |         |
| N° events/at risk (%)               | 50/228 (21.9) |                  | 221/784 (28.3) |                  | 271/1012 (26.8) |                  |         |
| Female sex                          | OR            | 0.42 (0.21-0.85) | 0.0150         | 0.69 (0.50-0.94) | 0.0210          | 0.64 (0.48-0.85) | 0.0020  |
| Age, +10 years                      | OR            | 1.36 (1.10-1.67) | 0.0036         | 1.52 (1.37-1.69) | <0.0001         | 1.48 (1.35-1.63) | <0.0001 |
|                                     | AUC           | 0.63 (0.55-0.71) | 0.0036         | 0.69 (0.65-0.73) | <0.0001         | 0.68 (0.64-0.72) | <0.0001 |
| BMI, +5 kg/m <sup>2</sup>           | OR            | 0.87 (0.64-1.19) | 0.3832         | 1.00 (0.87-1.16) | 0.9447          | 0.97 (0.85-1.11) | 0.6934  |
| Comorbidities present               | OR            | 1.99 (1.05-3.73) | 0.0351         | 2.74 (1.99-3.78) | <0.0001         | 2.59 (1.95-3.45) | <0.0001 |
| GFR, +30 ml/min/1.73 m <sup>2</sup> | OR            | 0.99 (0.81-1.20) | 0.8842         | 0.81 (0.68-0.95) | 0.0101          | 0.86 (0.75-0.99) | 0.0221  |
|                                     | AUC           |                  |                | 0.58 (0.53-0.63) |                 | 0.57 (0.53-0.61) | 0.0221  |
| WHO score, +1 point                 | OR            | 1.46 (1.15-1.86) | 0.0018         | 1.53 (1.32-1.77) | <0.0001         | 1.45 (1.29-1.63) | <0.0001 |
|                                     | AUC           | 0.62 (0.54-0.70) | 0.0025         | 0.60 (0.56-0.63) | <0.0001         | 0.60 (0.56-0.63) | <0.0001 |
| COV50, +1 SD                        | OR            | 2.44 (1.69-3.53) | <0.0001        | 2.47 (2.02-3.03) | <0.0001         | 2.44 (2.05-2.92) | <0.0001 |
|                                     | AUC           | 0.83 (0.77-0.90) | <0.0001        | 0.80 (0.76-0.85) | <0.0001         | 0.81 (0.77-0.85) | <0.0001 |

The odds ratio and the area under the curve, both given with 95% confidence interval, estimate the association size and discriminatory performance, respectively. Risk factors were determined at enrolment with the exception of GFR, which was measured after hospitalisation in 816 patients at risk. For GFR the death rates were 13.1% (25/191), 15.0% (94/625), and 14.6% (119/816) in the initial, continued and full recruitment cohorts; the corresponding rates of worsening WHO score were 26.2% (50/191), 34.2% (214/625), and 32.4% (264/816), respectively. Comorbidities include hypertension, heart failure, diabetes and cancer. The AUC was not computed for non-significant odds ratios and for categorical variables with only two levels. OR=odds ratio. AUC=area under the curve. BMI=body mass index. GFR=glomerular filtration rate estimated from serum creatinine using the CKD-EPI formula (*Ann Intern Med.* 2009; 150: 604-12).

**Table 6: Odds ratios relating outcome to COV50 by recruitment phase in hospitalised patients**

| Outcome                      | Initial          |         | Continued        |         | Full             |         |
|------------------------------|------------------|---------|------------------|---------|------------------|---------|
|                              | OR (95% CI)      | p value | OR (95%CI)       | p value | OR (95% CI)      | p value |
| <b>Mortality</b>             |                  |         |                  |         |                  |         |
| N° deaths/at risk (%)        | 25/191 (13.1)    |         | 94/625 (15.0)    |         | 119/816 (14.6)   |         |
| Unadjusted                   | 2.32 (1.58-3.40) | <0.0001 | 2.23 (1.79-2.77) | <0.0001 | 2.23 (1.85-2.69) | <0.0001 |
| Adjusted                     |                  |         |                  |         |                  |         |
| Sex and age                  | 2.16 (1.50-3.28) | <0.0001 | 1.82 (1.45-2.29) | <0.0001 | 1.97 (1.62-2.40) | <0.0001 |
| + baseline WHO score         | 2.18 (1.31-3.63) | 0.0028  | 1.54 (1.21-1.96) | 0.0005  | 1.65 (1.34-2.04) | <0.0001 |
| + BMI, comorbidities and GFR | 2.36 (1.34-4.15) | 0.0030  | 1.50 (1.16-1.93) | 0.0022  | 1.58 (1.27-1.98) | <0.0001 |
| <b>Progressing WHO score</b> |                  |         |                  |         |                  |         |
| N° events/at risk (%)        | 50/191 (26.2)    |         | 214/625 (34.2)   |         | 264/819 (32.4)   |         |
| Unadjusted                   | 1.74 (1.33-2.28) | <0.0001 | 1.53 (1.32-1.78) | <0.0001 | 1.56 (1.38-1.78) | <0.0001 |
| Adjusted                     |                  |         |                  |         |                  |         |
| Sex and age                  | 1.68 (1.27-2.21) | 0.0002  | 1.38 (1.18-1.61) | <0.0001 | 1.45 (1.27-1.66) | <0.0001 |
| + baseline WHO score         | 2.42 (1.62-3.61) | <0.0001 | 1.50 (1.27-1.77) | <0.0001 | 1.66 (1.43-1.93) | <0.0001 |
| + BMI, comorbidities and GFR | 2.43 (1.62-3.66) | <0.0001 | 1.54 (1.29-1.84) | <0.0001 | 1.68 (1.44-1.97) | <0.0001 |

Odds ratios given with 95% confidence interval express the risk for 1-SD increment in COV50. Initial recruitment lasted from 30 June 2020 until 19 November 2020 and continued recruitment from 30 April 2020 until 14 April 2021. Comorbidities include hypertension, heart failure, diabetes and cancer. BMI=body mass index; GFR=glomerular filtration rate.



**Table 7: Probability of progressing to a maximal WHO score during follow-up by entry COV50 level, entry WHO score, and age class**

| Baseline                        |        | Maximal WHO score during follow-up |        |        |        |        |
|---------------------------------|--------|------------------------------------|--------|--------|--------|--------|
| COV50<br>WHO score<br>Age class | Number | 1-2                                | 3      | 4      | 5      | 6-8    |
| <b>[-3-26, 3-39]</b>            | 1012   |                                    |        |        |        |        |
| 1-2                             | 199    | 0.9849                             | 0      | 0.0151 | 0      | 0      |
| 3                               | 246    | 0                                  | 0.6179 | 0.3089 | 0.0203 | 0.0529 |
| 4                               | 432    | 0                                  | 0      | 0.7361 | 0.0880 | 0.1759 |
| 5                               | 97     | 0                                  | 0      | 0      | 0.5773 | 0.4227 |
| 6                               | 38     | 0                                  | 0      | 0      | 0      | 1.0000 |
| <b>&lt;0.04, [19, 96 y]</b>     | 587    |                                    |        |        |        |        |
| 1-2                             | 194    | 1.0000                             | 0      | 0      | 0      | 0      |
| 3                               | 118    | 0                                  | 0.7024 | 0.2619 | 0.0179 | 0.0178 |
| 4                               | 212    | 0                                  | 0      | 0.8571 | 0.0714 | 0.0715 |
| 5                               | 41     | 0                                  | 0      | 0      | 0.9231 | 0.0769 |
| 6                               | 22     | 0                                  | 0      | 0      | 0      | 1.0000 |
| <b>≥0.04, [19, 96 y]</b>        | 587    |                                    |        |        |        |        |
| 1-2                             | 194    | 0.4000                             | 0      | 0.6000 | 0      | 0      |
| 3                               | 118    | 0                                  | 0.4359 | 0.4103 | 0.0256 | 0.1282 |
| 4                               | 212    | 0                                  | 0      | 0.6356 | 0.1017 | 0.2627 |
| 5                               | 41     | 0                                  | 0      | 0      | 0.4507 | 0.5493 |
| 6                               | 22     | 0                                  | 0      | 0      | 0      | 1.0000 |
| <b>&lt;0.04, &lt;65 y</b>       | 120    |                                    | 0      |        |        |        |
| 1-2                             | 2      | 0.5000                             | 0      | 0.5000 | 0      | 0      |
| 3                               | 15     | 0                                  | 0.7143 | 0.2381 | 0.0476 | 0      |
| 4                               | 38     | 0                                  | 0      | 0.6200 | 0.1800 | 0.2000 |
| 5                               | 26     | 0                                  | 0      | 0      | 0.5517 | 0.4483 |
| 6                               | 39     | 0                                  | 0      | 0      | 0      | 1.0000 |
| <b>≥0.04, ≥65 y</b>             |        |                                    |        |        |        |        |
| 1-2                             | 0      | 0                                  | 0      | 1.0000 | 0      | 0      |
| 3                               | 19     | 0                                  | 0.3334 | 0.4737 | 0.0175 | 0.1754 |
| 4                               | 147    | 0                                  | 0      | 0.6398 | 0.0806 | 0.2796 |
| 5                               | 32     | 0                                  | 0      | 0      | 0.3810 | 0.6190 |
| 6                               | 107    | 0                                  | 0      | 0      | 0      | 1.0000 |

The transition matrix was derived from the participants enrolled in CRIT-Cov-U according to the transition diagram shown on page 17. The number of patients progressing to a higher WHO score during follow-up was simulated by multiplying the baseline distribution vector by the transition matrix as derived from the current dataset, using the IML procedure as implemented in the SAS software and 1000 iterations to determine the distribution around the initial point estimate. The age stratification was only introduced for the patients with the highest risk of progression (COV50 level at entry  $\geq 0.04$ ).

**Table 8: Summary of Markov chain simulation for WHO score progression by entry COV50 level, baseline WHO score, and age class**

| COV50 level       | Percentiles | Age class | Number of patients expected with maximal WHO score during follow-up |     |     |     |     | Total |
|-------------------|-------------|-----------|---------------------------------------------------------------------|-----|-----|-----|-----|-------|
|                   |             |           | 1-2                                                                 | 3   | 4   | 5   | 6-8 |       |
| [-3-26, 3-39]     | O           |           | 196                                                                 | 152 | 397 | 99  | 168 | 1012  |
|                   | 5           | S         | 193                                                                 | 140 | 383 | 88  | 149 | 953   |
|                   | 25          | S         | 195                                                                 | 146 | 390 | 94  | 160 | 985   |
|                   | 50          | S         | 196                                                                 | 152 | 397 | 99  | 168 | 1012  |
|                   | 75          | S         | 197                                                                 | 157 | 403 | 103 | 177 | 1037  |
|                   | 95          | S         | 199                                                                 | 164 | 411 | 110 | 188 | 1072  |
| <0-04, [19, 96 y] | O           |           | 194                                                                 | 118 | 212 | 41  | 22  | 587   |
|                   | 5           | S         | 194                                                                 | 108 | 203 | 34  | 14  | 553   |
|                   | 25          | S         | 194                                                                 | 114 | 208 | 38  | 18  | 572   |
|                   | 50          | S         | 194                                                                 | 118 | 212 | 41  | 22  | 587   |
|                   | 75          | S         | 194                                                                 | 123 | 216 | 43  | 25  | 601   |
|                   | 95          | S         | 194                                                                 | 129 | 221 | 48  | 30  | 622   |
| ≥0-04, [19, 96 y] | O           |           | 2                                                                   | 34  | 185 | 58  | 146 | 425   |
|                   | 5           | S         | 0                                                                   | 27  | 172 | 49  | 128 | 376   |
|                   | 25          | S         | 1                                                                   | 31  | 179 | 54  | 139 | 404   |
|                   | 50          | S         | 2                                                                   | 34  | 184 | 58  | 146 | 424   |
|                   | 75          | S         | 3                                                                   | 36  | 190 | 62  | 153 | 444   |
|                   | 95          | S         | 4                                                                   | 41  | 198 | 68  | 164 | 475   |
| ≥0-04, <65 y      | O           |           | 2                                                                   | 15  | 38  | 26  | 39  | 120   |
|                   | 5           | S         | 0                                                                   | 12  | 33  | 21  | 32  | 98    |
|                   | 25          | S         | 1                                                                   | 14  | 36  | 24  | 36  | 111   |
|                   | 50          | S         | 2                                                                   | 15  | 38  | 26  | 39  | 120   |
|                   | 75          | S         | 3                                                                   | 17  | 40  | 28  | 42  | 130   |
|                   | 95          | S         | 4                                                                   | 18  | 43  | 30  | 47  | 142   |
| ≥0-04, ≥65 y      | O           |           | 0                                                                   | 19  | 147 | 32  | 107 | 305   |
|                   | 5           | S         | 0                                                                   | 13  | 134 | 25  | 92  | 264   |
|                   | 25          | S         | 0                                                                   | 17  | 142 | 29  | 100 | 288   |
|                   | 50          | S         | 0                                                                   | 19  | 147 | 32  | 107 | 305   |
|                   | 75          | S         | 0                                                                   | 21  | 153 | 35  | 113 | 322   |
|                   | 95          | S         | 0                                                                   | 25  | 159 | 39  | 122 | 345   |

Values are the number of patients progressing to a higher WHO score. For each cell in the transition matrix, the distribution of the predicted number of patients progressing to a higher WHO score is characterised by providing the 5th, 25th, 50th, 75th and 95th percentiles. The age stratification was only introduced for the patients with the highest risk of progression (COV50 level at entry ≥0-04). O=observed number of patients. S=simulated number of patients.

**Table 9: Simulated hospitalisation costs by hospital facility at presentation and age class**

| Baseline COV50<br>Entry hospital facility | Item | Hospitalisation costs<br>expressed per 1000<br>patients hospitalised for 1<br>week | Cost reduction<br>associated with 1-day<br>less hospitalisation<br>per 1000 patients |
|-------------------------------------------|------|------------------------------------------------------------------------------------|--------------------------------------------------------------------------------------|
| <b>[-3-26, 3-39]</b>                      |      |                                                                                    |                                                                                      |
| Regular and intermediate care             | days | 6 (4-14)                                                                           |                                                                                      |
|                                           | M€   | 3.393 (3.633-4.225)                                                                |                                                                                      |
| Intensive care                            | days | 7 (4-13)                                                                           |                                                                                      |
|                                           | M€   | 6.456 (5.710-7.205)                                                                |                                                                                      |
| All care facilities                       | days | 9 (4-15)                                                                           |                                                                                      |
|                                           | M€   | 10.366 (9.343-11.430)                                                              | 1.481 (1.335-1.633)                                                                  |
| <b>&lt;0-04</b>                           |      |                                                                                    |                                                                                      |
| Regular and intermediate care             | days | 7 (3-13)                                                                           |                                                                                      |
|                                           | M€   | 4.617 (4.137-5.103)                                                                |                                                                                      |
| Intensive care                            | days | 6 (4-11)                                                                           |                                                                                      |
|                                           | M€   | 1.591 (0.973-2.170)                                                                |                                                                                      |
| All care facilities                       | days | 8 (4-13)                                                                           |                                                                                      |
|                                           | M€   | 6.208 (5.110-7.273)                                                                | 0.887 (0.730-1.039)                                                                  |
| <b>≥0-04, [19, 96 y]</b>                  |      |                                                                                    |                                                                                      |
| Regular and intermediate care             | days | 11 (5-16)                                                                          |                                                                                      |
|                                           | M€   | 3.740 (3.289-4.257)                                                                |                                                                                      |
| Intensive care                            | days | 6 (4-18)                                                                           |                                                                                      |
|                                           | M€   | 10.946 (9.596-12.296)                                                              |                                                                                      |
| All care facilities                       | days | 11 (5-17)                                                                          |                                                                                      |
|                                           | M€   | 14.686 (12.872-16.553)                                                             | 2.089 (1.839-2.365)                                                                  |
| <b>≥0-04, &lt;65 y</b>                    |      |                                                                                    |                                                                                      |
| Regular and intermediate care             | days | 10 (4-17)                                                                          |                                                                                      |
|                                           | M€   | 5.182 (4.246-5.975)                                                                |                                                                                      |
| Intensive care                            | days | 5 (4-14)                                                                           |                                                                                      |
|                                           | m€   | 9.850 (8.082-11.870)                                                               |                                                                                      |
| All care facilities                       | days | 11 (5-17)                                                                          |                                                                                      |
|                                           | M€   | 15.032 (12.328-17.845)                                                             | 2.147 (1.761-2.549)                                                                  |
| <b>≥0-04, ≥65 y</b>                       |      |                                                                                    |                                                                                      |
| Regular and intermediate care             | days | 10 (4-17)                                                                          |                                                                                      |
|                                           | m€   | 2.805 (2.378-3.220)                                                                |                                                                                      |
| Intensive care                            | days | 5 (4-14)                                                                           |                                                                                      |
|                                           | M€   | 9.296 (7.993-10.600)                                                               |                                                                                      |
| All care facilities                       | days | 11 (5-17)                                                                          |                                                                                      |
|                                           | M€   | 12.101 (10.371-13.820)                                                             | 1.729 (1.482-1.974)                                                                  |

Hospitalisation costs per care facility (median and 95% percentile interval) were extrapolated from the distributions of patients to be expected by Markov chain simulation reaching follow-up WHO scores of 3-4, 5, and 6-8 and the care facility corresponding with disease severity, i.e., regular, intermediate and intensive care for scores 3-4, 5, and 6-8, respectively. Cost estimates in intensive care units also include the costs of lower care facilities to which patients were admitted before or after they reached their maximal WHO score during follow-up. Days refers to the median number of days (interquartile interval) as observed in the CRIT-Cov-U cohort. M€ indicates million Euro.

**Table 10: Statistics extracted from outcome trials in COVID-19 patients**

| Trial           | Design | Setting           | Timing        | Control treatment     | Experimental treatment                 | FU (days) | Endpoint extracted               | Results (control vs intervention)                       | p                  |
|-----------------|--------|-------------------|---------------|-----------------------|----------------------------------------|-----------|----------------------------------|---------------------------------------------------------|--------------------|
| PRINCIPLE, 2021 | SB (B) | A mild            | ...           | usual care            | inhaled budesonide                     | 28        | hospitalisation                  | 94/1069 (8-8) vs 54/787 (6-8)                           | >99.9              |
| ACTT-1, 2020    | DB     | H moderate severe | 9 (6-12)      | placebo               | remdesivir                             | 28        | days to recovery (WHO scale 0-3) | 10 vs 15                                                | <0.0001            |
| Hung, 2020      | O      | H mild moderate   | 5 (3-7)       | lopinavir + ritonavir | lopinavir + ritonavir + interferon b1b | 14        | hospital days                    | 9 (7-13) vs 14 (9-16)                                   | 0.016              |
| RECOVERY, 2021  | O (B)  | H moderate severe | 9 (7-14)      | usual care            | tocilizumab                            | 28        | days to discharge                | >28 vs 19                                               |                    |
|                 |        |                   |               |                       |                                        |           | discharged within 28 d           | 1044/2094 (49.9) vs 1150/2022 (56.9)                    | <0.0001            |
| BLAZE-1, 2021   | O      | A mild moderate   | 4 (...)       | placebo               | bamlanivimab + etesivimab              | 29        | hospitalisation                  | 37/517 (7.2) vs 12/518 (2.3)                            | ...                |
| Wang, 2020      | DB     | H moderate severe | 11 (9-12)     | placebo               | remdesivir                             | 28        | days of IMV in survivors         | 42.0 (17.0-46.0) vs 19 (5-42)                           | ...                |
| REMAP-CAP, 2021 | O (B)  | ICU severe        | 1.2 (0.8-2.8) | usual care            | tocilizumab or sarilumab               | 21        | support-free days                | UC: 0 (-1 to 15)<br>T: 10 (-1 to 16)<br>S: 11 (0 to 16) | T: 99.9<br>S: 99.5 |
| RECOVERY, 2021  | O      | H moderate severe | 9 (5-13)      | usual care            | dexamethasone                          | 28        | cessation of IMV                 | 268/683 (39.2) vs 160/324 (49.4)                        | ...                |

Trials are identified by acronym or the surname of the first author, year of publication and the reference number in the article text. Design refers to type of masking (O, open; SB, single blind; DB, double blind; B, a Bayesian statistical approach. Setting refers to the recruitment of ambulatory (A) or hospitalised (H) patients and the disease stage at enrolment according to the WHO scale: mild, <3; moderate, 3-4; severe, 6-8. Timing refers to the median number of day (interquartile range) between symptom-onset and randomisation; for REMAP-CAP, the number of hours between ICU admission and randomisation is given. Control and experimental indicate the treatments administered. Patients randomised to experimental also received usual care. FU is the duration of follow-up in days. Results in the control vs experimental group are given in days, -1 indicating death, or as the proportion of patients. UC/T/S indicate usual care/tocilizumab/sarilumab and IMV invasive mechanical ventilation. p is the posterior probability of superiority of the experimental treatment for trials that applied a Bayesian approach or the conventional significance level. An ellipsis indicates data not available in the publication. Full details of the selected (n=8) and non-selected (n=44) trials and corresponding references are available via <https://www.appremed.org/Publications8>.

**Table 11: Baseline characteristics of the full CRIT-Cov-U cohort and the 2022 substudy**

| Characteristic                                    | CRIT-Cov-U   | Substudy     |
|---------------------------------------------------|--------------|--------------|
| Number in group                                   | 1012         | 62           |
| Main study variables                              |              |              |
| WHO score                                         |              |              |
| 1-3                                               | 445 (44.0)   | 35 (56.5)    |
| 4-5                                               | 529 (52.3)   | 27 (43.5)    |
| 6                                                 | 38 (3.8)     | 0 (0.0)      |
| COV50 level                                       | -0.23 (1.40) | -0.45 (1.10) |
| Vaccination status                                |              |              |
| None or unknown                                   | 1012 (100.0) | 18 (29.0)    |
| 1                                                 |              | 2 (3.2)      |
| 2                                                 |              | 14 (22.6)    |
| ≥3                                                |              | 28 (45.2)    |
| Number with characteristic (%)                    |              |              |
| Women                                             | 447 (44.2)   | 26 (41.9)    |
| Hypertension                                      | 557 (55.0)   | 38 (61.3)    |
| Heart failure                                     | 154 (15.2)   | 0 (0.0)      |
| Body mass index ≥30 kg/m <sup>2</sup>             | 251 (24.8)   | 12 (19.4)    |
| Diabetes mellitus                                 | 257 (25.4)   | 25 (40.3)    |
| Cancer                                            | 106 (10.5)   | 12 (19.4)    |
| Chronic obstructive lung disease                  | ...          | 7 (11.3)     |
| Immunosuppressed                                  | ...          | 13 (21.0)    |
| Mean (SD) of characteristic                       |              |              |
| Age                                               | 62.3 (17.8)  | 64.9 (19.8)  |
| Body mass index, kg/m <sup>2</sup>                | 27.6 (5.2)   | 27.1 (7.1)   |
| Glomerular filtration, ml/min/1.73 m <sup>2</sup> | 85.6 (37.6)  | 69.8 (39.6)  |

The CRIT-Cov-U cohort was enrolled from 30 June 2020 until 14 April 2021 and the patients enrolled in the substudy from 7 February 2022 until 16 March 2022. One patient was infected by the delta variant and 61 by the omicron strain. The glomerular filtration rate estimated from serum creatinine using the CKD-EPI formula (*Ann Intern Med.* 2009; 150: 604-12). In the CRIT-Cov-U cohort glomerular filtration was unavailable in 196 ambulatory patients. An ellipsis indicates that data were not on file.

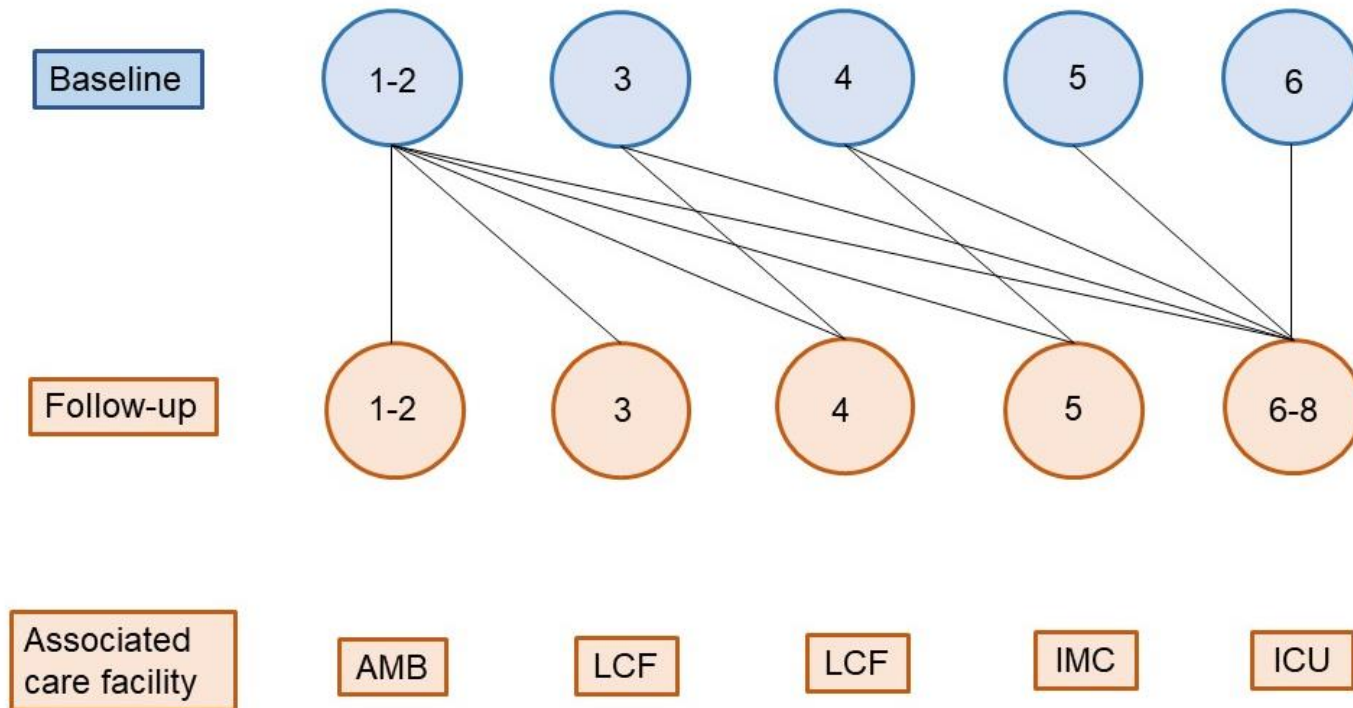

**Figure 1:**

**Transition diagram applied for Markov modelling of the probability of progression of the baseline WHO score during follow-up.**

The WHO-score categories are: (1) ambulatory without limitation of activity; (2) ambulatory with limited activity; (3) hospitalised without oxygen therapy; (4) hospitalised on oxygen therapy by mask or nasal prongs; (5) hospitalised receiving non-invasive ventilation or high-flow oxygen therapy; (6) hospitalised with intubation and mechanical ventilation; (7) hospitalised with mechanical ventilation and additional organ support, such as vasopressors, renal replacement therapy, or extracorporeal membrane oxygenation; and (8) death. The associated care facilities are ambulatory care (AMB) and hospitalised care in a regular ward (LCF), intermediate care (IMC) or intensive care (ICU).

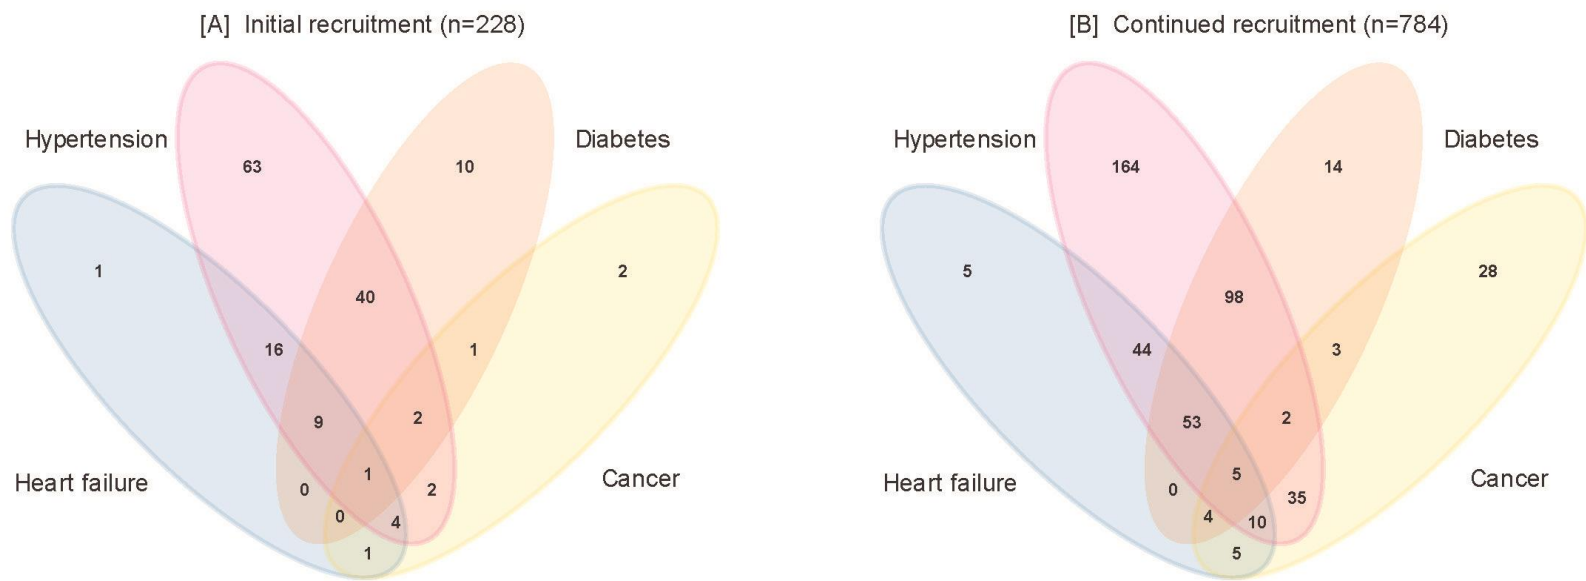

**Figure 2:**

**Overlap in comorbidities in the initial cohort (A) and the continued recruitment cohort (B).**

Numbers are not additive, because most patients had several comorbidities.

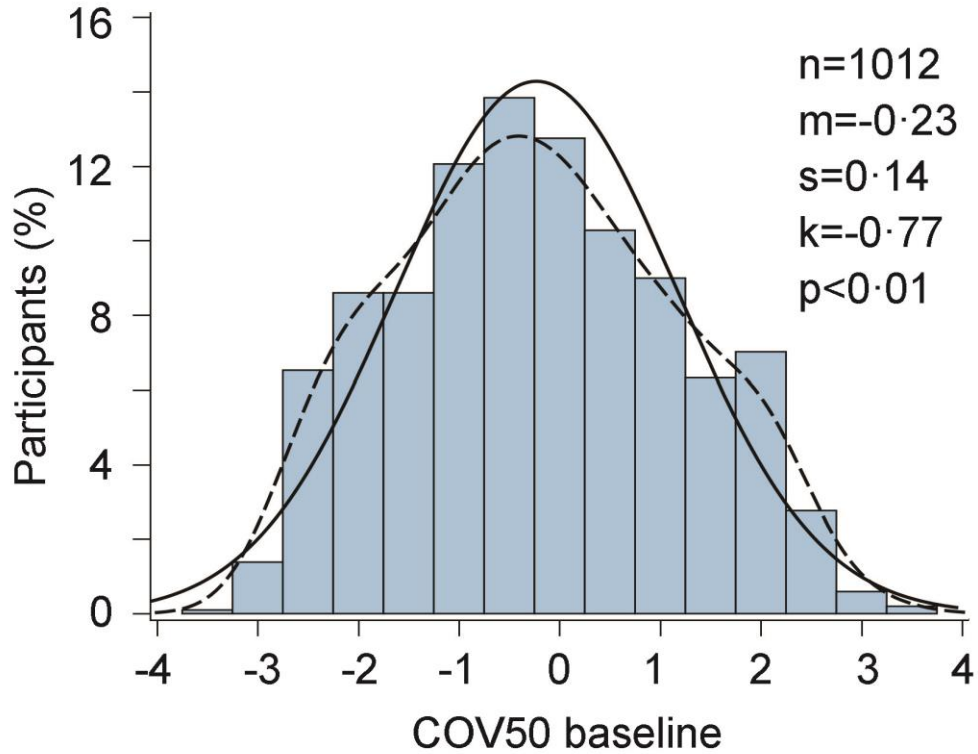

**Figure 3:**

**Distribution of the urinary COV50 marker in the whole study population.**

$n$ ,  $m$ ,  $s$  and  $k$  indicate the number of patients, the arithmetic mean and the coefficients of skewness and kurtosis. The solid and dotted lines represent the normal and kernel density distributions. The  $p$ -value is for departure of the actually observed distribution from normality according to the Kolmogorov-Smirnov test.



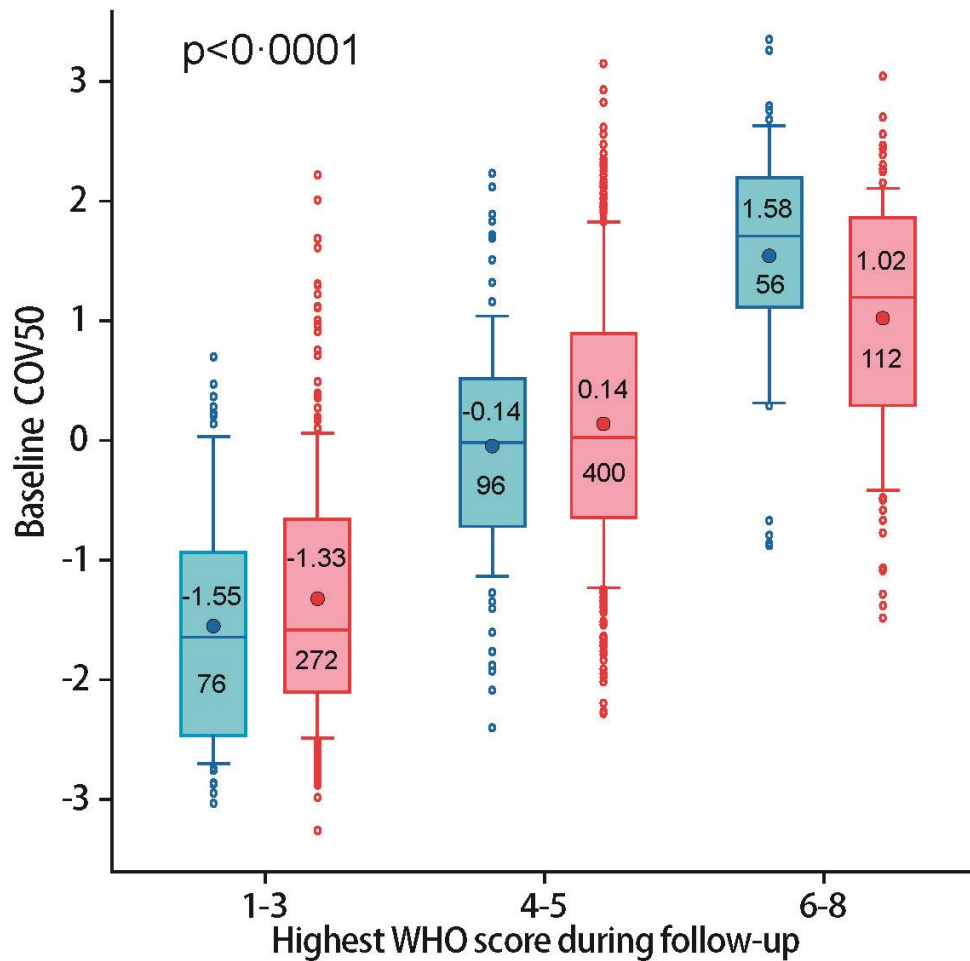

**Figure 4:**

**Boxplots showing the distributions of the urinary biomarker COV50 at baseline by the worst WHO score attained during follow-up in the initial (blue) and continued recruitment (pink) cohorts.** The central line, the upper and lower lines, and the upper and lower caps represent the median, interquartile range, and the 10th to 90th percentile interval. The arithmetic means and extreme measurements are represented by circles inside the box and outside the whiskers, respectively. The arithmetic means and the number of data points contributing to each whisker plot is given within the boxes. The p value denotes the overall between-WHO category significance derived by ANOVA.

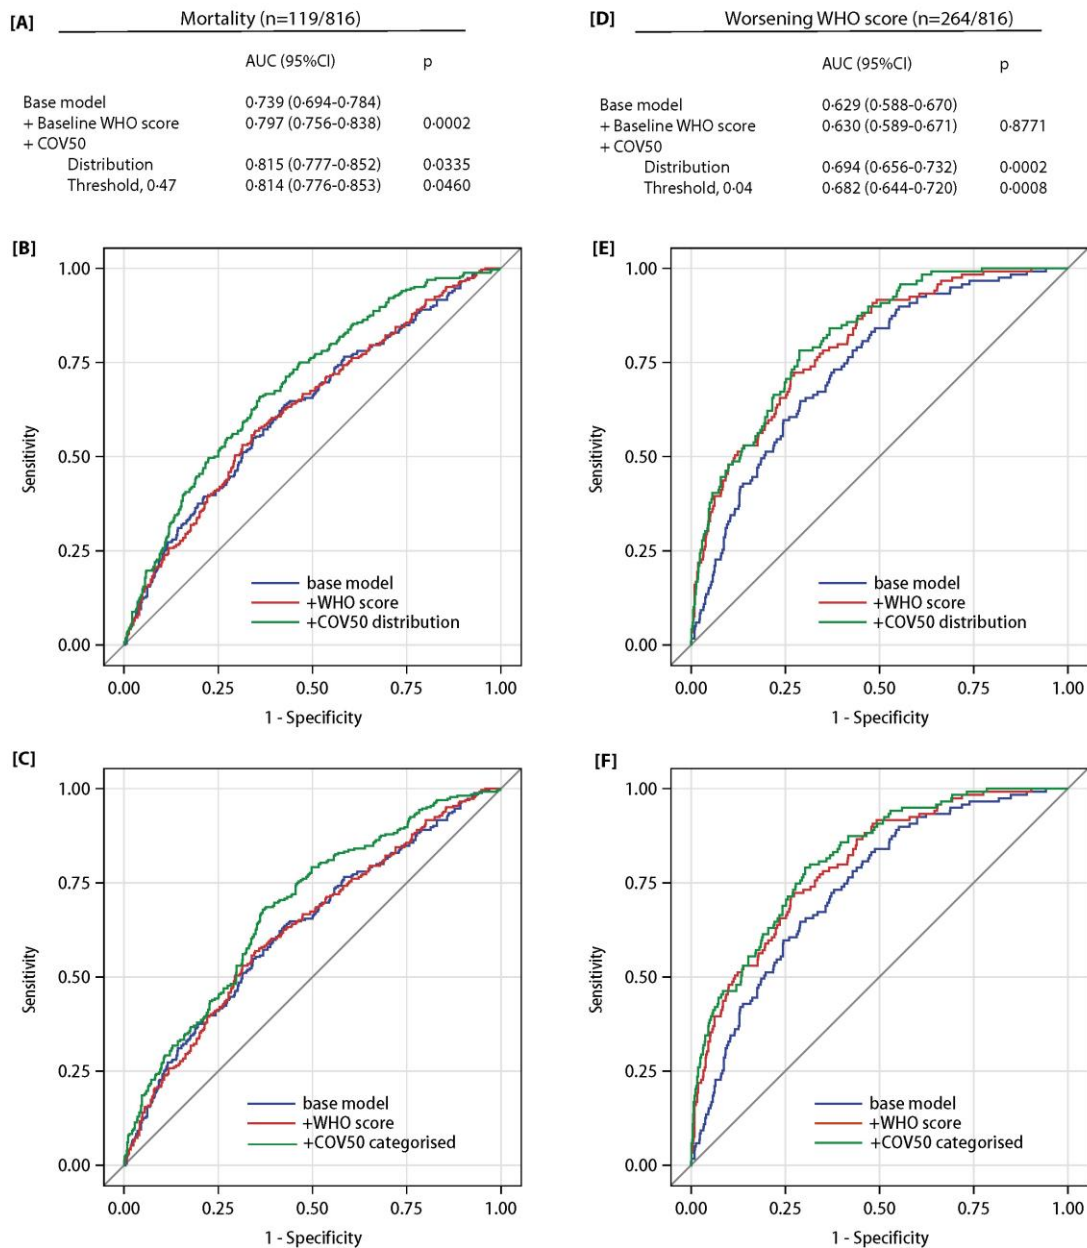

**Figure 5:**

**Performance of the COV50 urinary marker on top of other baseline risk factors in 816 hospitalised patients for contrasting mortality vs survival (panels A-C) and for progression vs non-progression in the baseline WHO score during follow-up (panels D-F).**

The base model included sex, age, body mass index, the presence of comorbidities (hypertension, heart failure, diabetes and cancer), and the glomerular filtration rate. In subsequent steps, the baseline WHO score was added and next COV50 as a continuously distributed variable (panels B and E) or as a categorised variable based on an optimised threshold of 0.47 for mortality (panel C) or 0.04 for a worsening WHO score (panel F). At each step, the p-values are for the comparison with the preceding
